# Supplementary material for: Exploring the Emergent Redox Chemistry of Pd(II) Nodes with Pendant Ferrocenes: From Precursors, through Building Blocks, to Self-Assemblies
Source: MDPI journal article supplement (doi:10.3390/inorganics11030122), 2023-03-15
Supplement: s1 [file s1]

# Exploring the Emergent Redox Chemistry of Pd(II) Nodes with Pendant Ferrocenes: from Precursors, through Building Blocks, to Self-Assemblies

Austin B. Gilbert, Matthew R. Crawley, Trevor J. Higgins, Yuguang C. Li, David F. Watson\*, Timothy R. Cook\*

*Department of Chemistry, University at Buffalo the State University of New York, Buffalo, New York 14260, United States*

## Supporting Information

Spectroscopic, electrochemical, and spectroelectrochemical characterization

|                                                                                                                                            |            |
|--------------------------------------------------------------------------------------------------------------------------------------------|------------|
| <b>Figure S1:</b> UV-Vis spectra of Fc-containing compounds .....                                                                          | <b>S2</b>  |
| <b>Figure S2:</b> <sup>1</sup> H-NMR spectrum of <b>Pd(dppf)Cl<sub>2</sub></b> in D <sub>2</sub> -DCM.....                                 | <b>S3</b>  |
| <b>Figure S3:</b> <sup>1</sup> H-NMR spectrum of [Pd(dppf)(ACN) <sub>2</sub> ](PF <sub>6</sub> ) <sub>2</sub> in D <sub>2</sub> -DCM ..... | <b>S4</b>  |
| <b>Figure S4:</b> <sup>1</sup> H-NMR spectra of <b>Pd(dppf)bpy</b> and <b>Pd(dppf)TPT</b> in D <sub>2</sub> -DCM .....                     | <b>S5</b>  |
| <b>Figure S5:</b> <sup>1</sup> H-DOSY-NMR spectrum of <b>Pd(dppf)TPT</b> in D <sub>2</sub> -DCM.....                                       | <b>S6</b>  |
| <b>Figure S6:</b> Full ESI-FT-ICR MS of <b>Pd(dppf)bpy</b> .....                                                                           | <b>S7</b>  |
| <b>Figure S7:</b> Full ESI-FT-ICR MS of <b>Pd(dppf)TPT</b> .....                                                                           | <b>S7</b>  |
| <b>Figure S8:</b> Cyclic voltammograms of <b>Pd(dppf)Cl<sub>2</sub></b> Fc-centered oxidation.....                                         | <b>S8</b>  |
| <b>Figure S9:</b> Full cyclic voltammograms of <b>Pd(dppf)Cl<sub>2</sub></b> .....                                                         | <b>S8</b>  |
| <b>Figure S10:</b> Cyclic voltammograms of <b>Pd(dppf)bpy</b> Fc-centered oxidation .....                                                  | <b>S9</b>  |
| <b>Figure S11:</b> Full cyclic voltammograms of <b>Pd(dppf)bpy</b> .....                                                                   | <b>S9</b>  |
| <b>Figure S12:</b> Cyclic voltammograms of <b>Pd(dppf)bpy</b> reduction events .....                                                       | <b>S10</b> |
| <b>Figure S13:</b> Full cyclic voltammograms of <b>Pd(dppf)TPT</b> .....                                                                   | <b>S10</b> |
| <b>Figure S14:</b> Cyclic voltammograms of <b>Pd(dppf)TPT</b> Fc-centered oxidation at 250 mV/s.....                                       | <b>S11</b> |
| <b>Figure S15:</b> Cyclic voltammograms of <b>Pd(dppf)TPT</b> Fc-centered oxidation at 100 mV/s.....                                       | <b>S11</b> |
| <b>Figure S16:</b> Cyclic voltammograms of <b>Pd(dppf)TPT</b> Fc-centered oxidation at 80 mV/s.....                                        | <b>S12</b> |
| <b>Figure S17:</b> Cyclic voltammograms of <b>Pd(dppf)TPT</b> Fc-centered oxidation at 60 mV/s.....                                        | <b>S12</b> |
| <b>Figure S18:</b> Cyclic voltammograms of <b>Pd(dppf)TPT</b> Fc-centered oxidation at 40 mV/s.....                                        | <b>S13</b> |
| <b>Figure S19:</b> Cyclic voltammograms of <b>Pd(dppf)TPT</b> Fc-centered oxidation at 20 mV/s.....                                        | <b>S13</b> |
| <b>Figure S20:</b> Cyclic voltammograms of <b>Pd(dppf)TPT</b> Fc-centered oxidation at 10 mV/s.....                                        | <b>S14</b> |
| <b>Figure S21:</b> Plots of peak current vs. square root of scan rate with linear fits for <b>Pd(dppf)TPT</b> .....                        | <b>S14</b> |
| <b>Figure S22:</b> Spectroelectrochemical UV-Vis spectra of oxidized Fc-containing compounds .....                                         | <b>S15</b> |
| <b>Figure S23:</b> Images of FTO film working electrodes used in diffuse reflectance spectroelectrochemistry .....                         | <b>S16</b> |

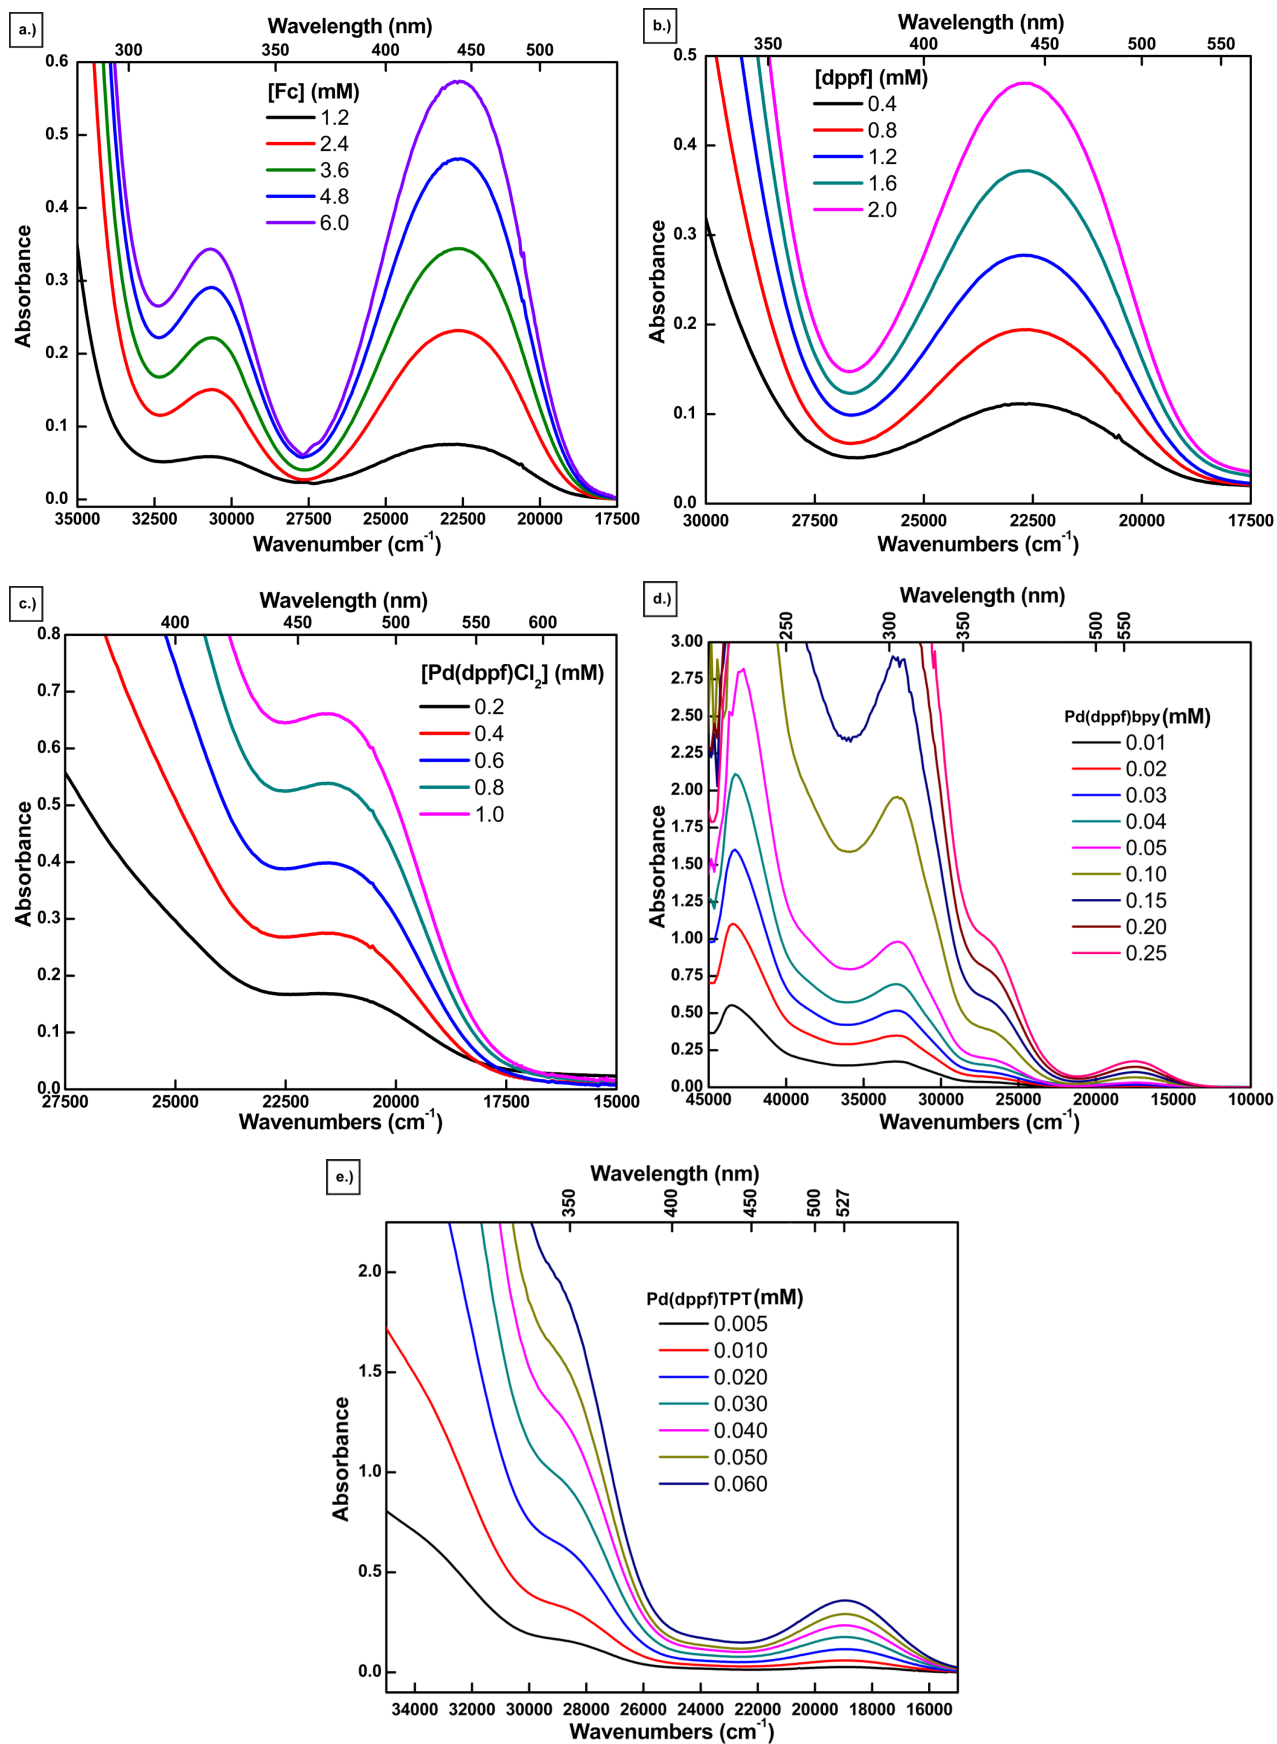

**Figure S1:** UV-Vis absorbance spectra of a.) **Fc**, b.) **dppf**, c.) **Pd(dppf)Cl<sub>2</sub>**, d.) **Pd(dppf)bpy**, e.) **Pd(dppf)TPT**. All spectra were acquired at the specified sample concentration in dry DCM.

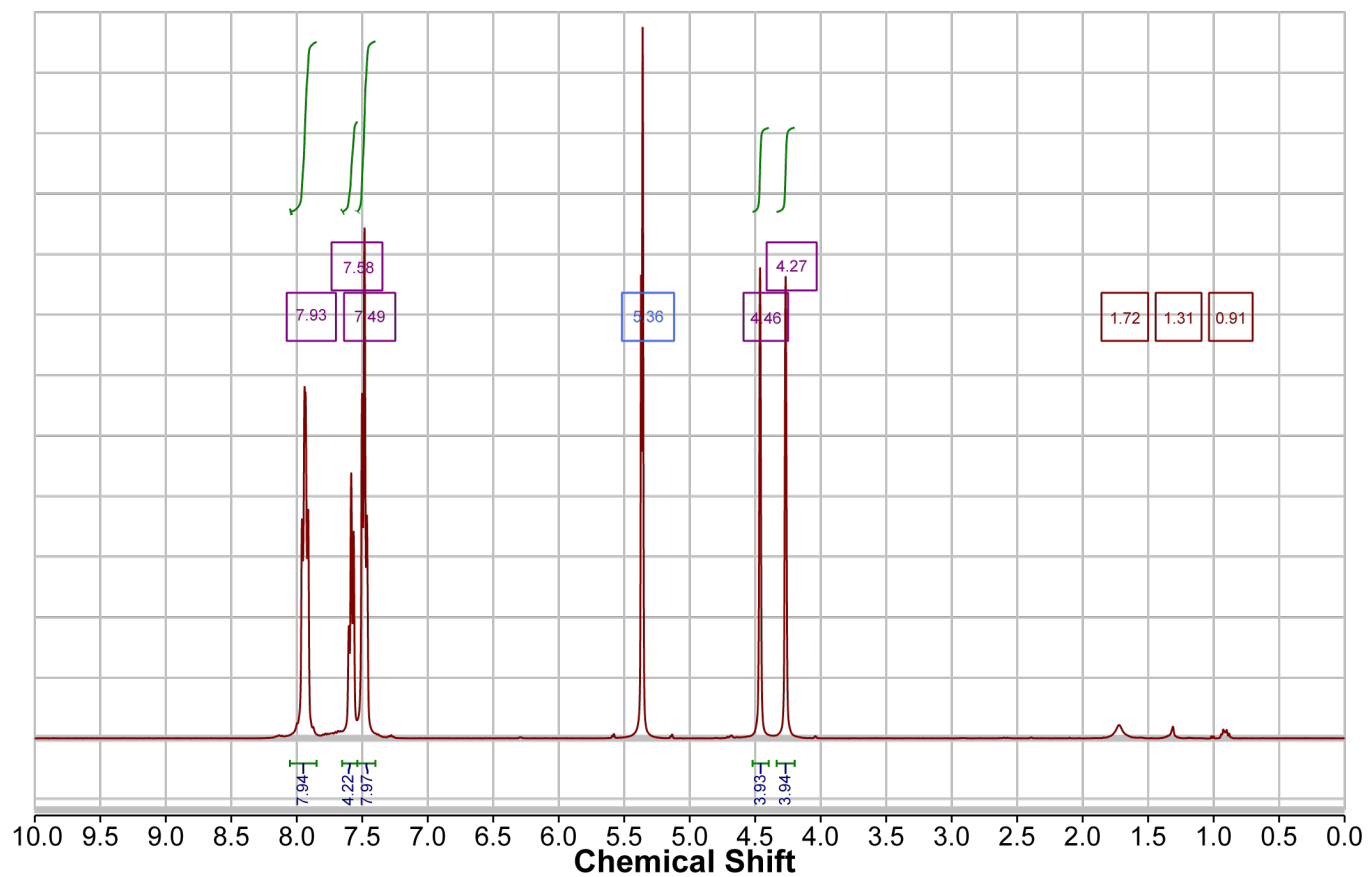

**Figure S2:**  $^1\text{H}$ -NMR spectrum of  $\text{Pd}(\text{dppf})\text{Cl}_2$  acquired in  $\text{D}_2\text{-DCM}$ .

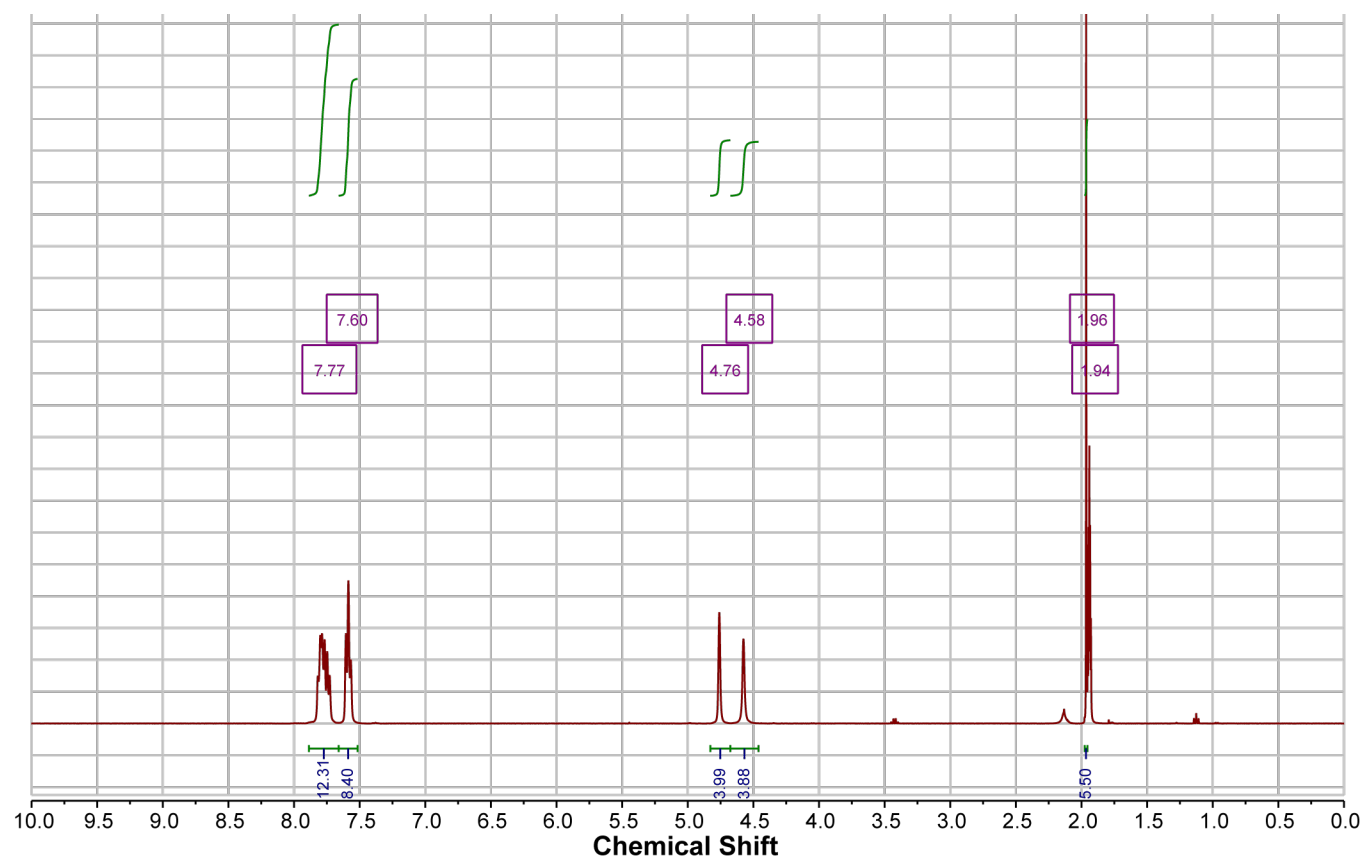

**Figure S3:**  $^1\text{H}$ -NMR spectrum of  $[\text{Pd}(\text{dppf})(\text{ACN})_2](\text{PF}_6)_2$  acquired in  $\text{D}_2\text{-DCM}$ .

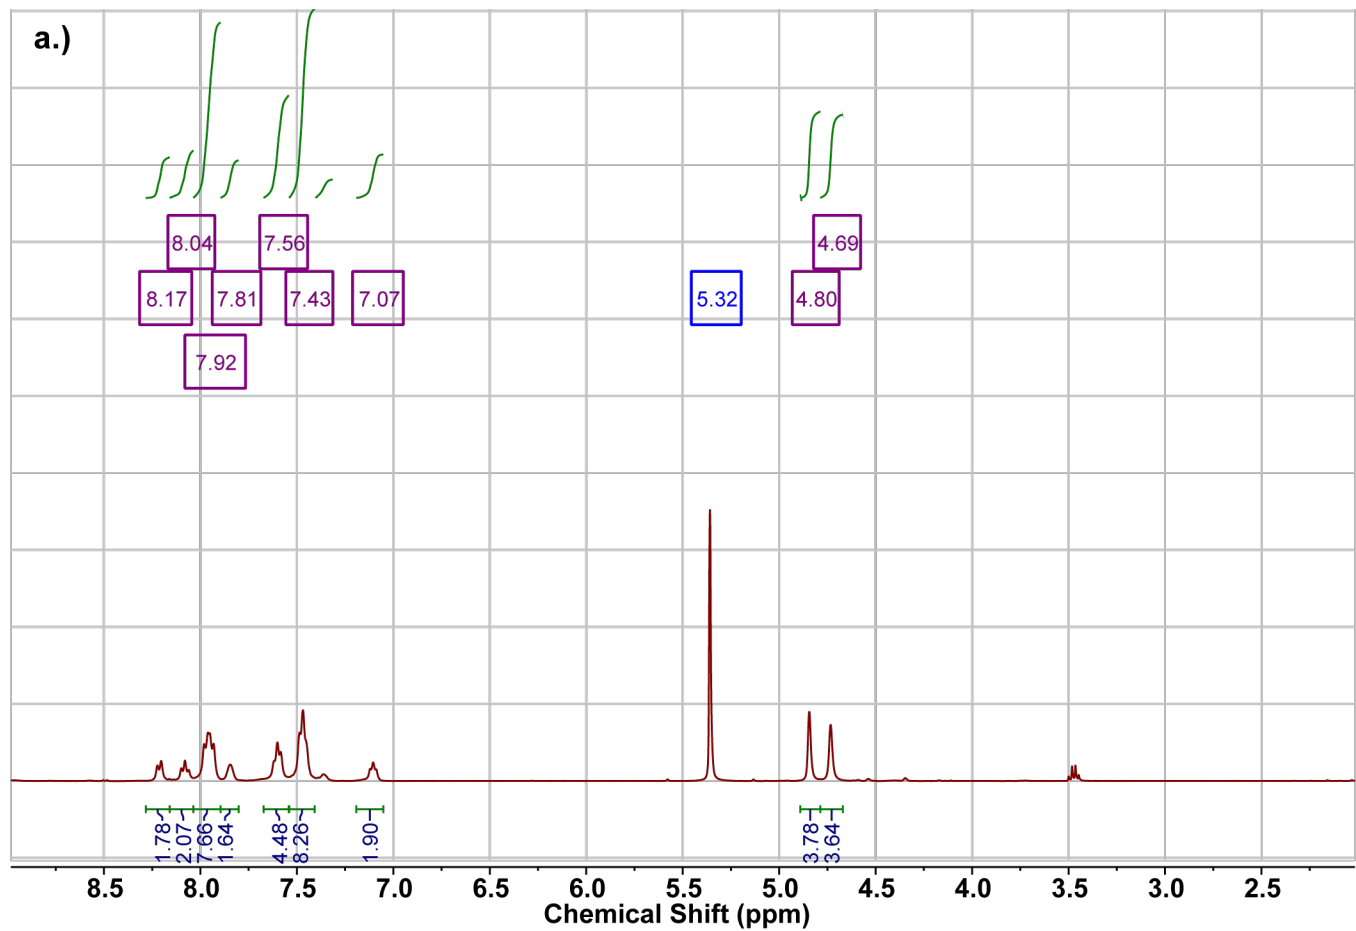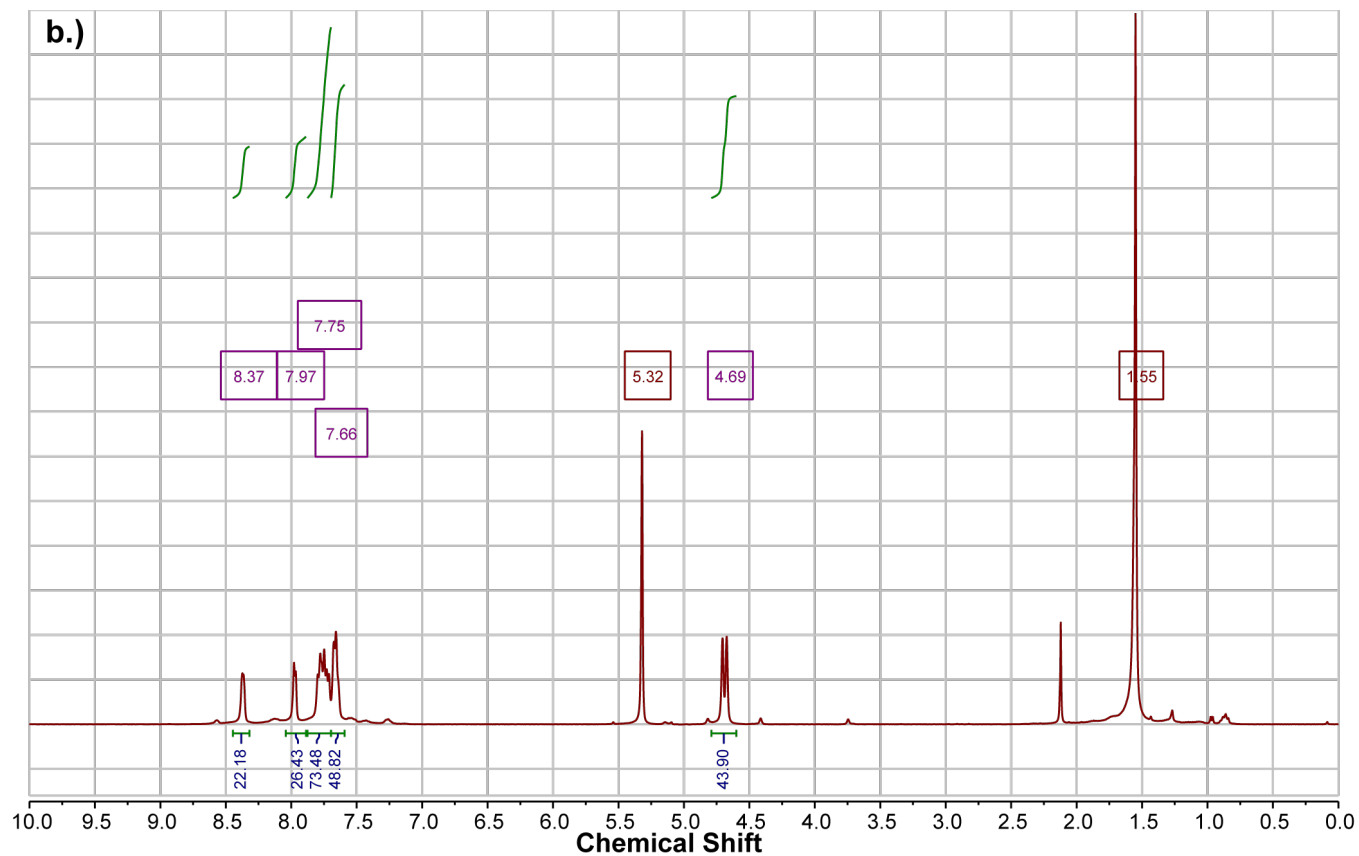

Figure S4:  $^1\text{H}$ -NMR spectra of a.)  $\text{Pd}(\text{dppf})\text{bpy}$  and b.)  $\text{Pd}(\text{dppf})\text{TPT}$  acquired in  $\text{D}_2\text{-DCM}$ .

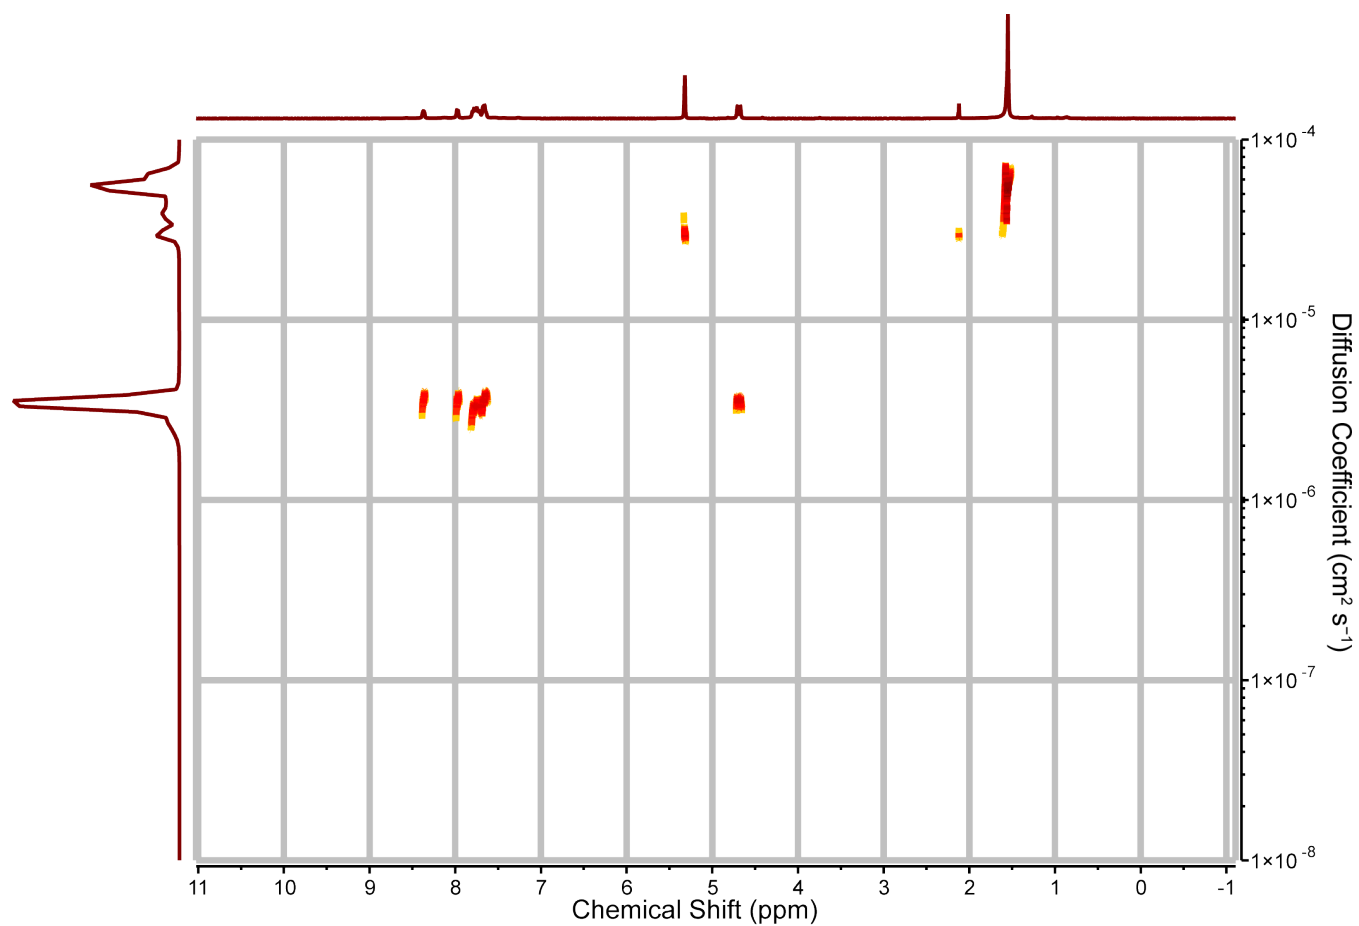

**Figure S5:**  $^1\text{H}$ -DOSY NMR spectrum of **Pd(dppf)TPT** acquired in  $\text{D}_2$ -DCM.

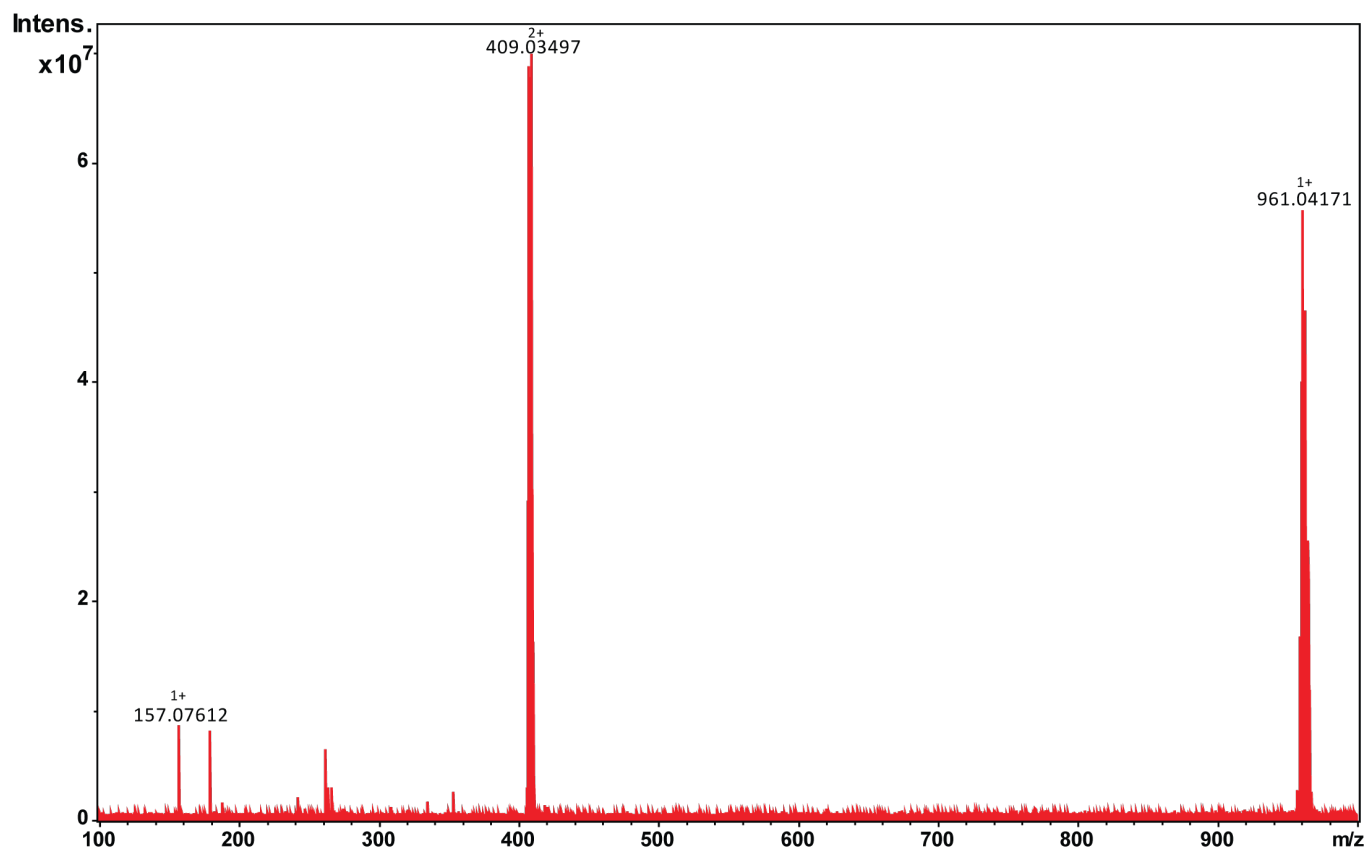

Figure S6: Full ESI-FT-ICR MS of  $\text{Pd}(\text{dppf})\text{bpy}$  acquired from a solution in DCM.

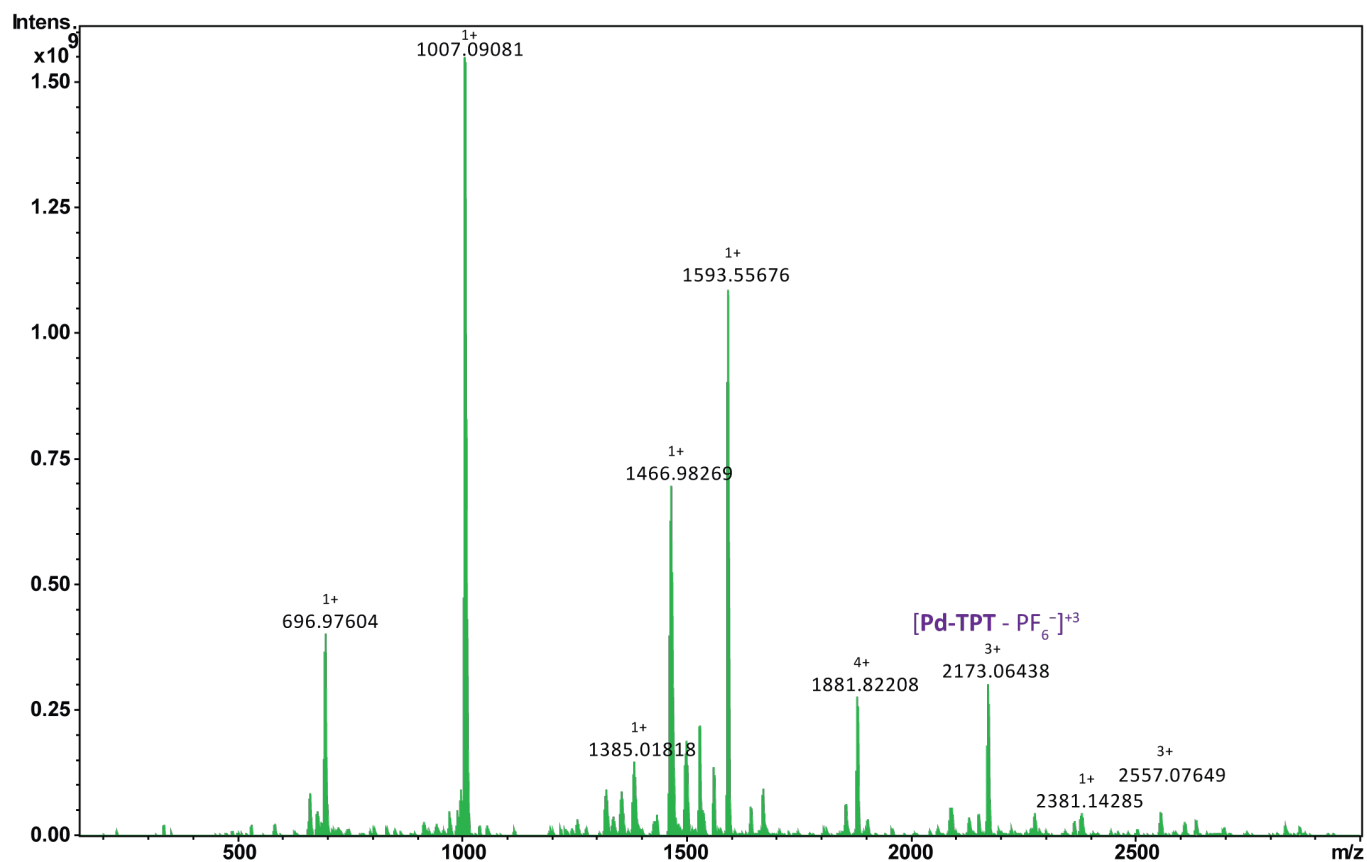

Figure S7: Full ESI-FT-ICR MS of  $\text{Pd}(\text{dppf})\text{TPT}$  acquired from a solution in DCM.

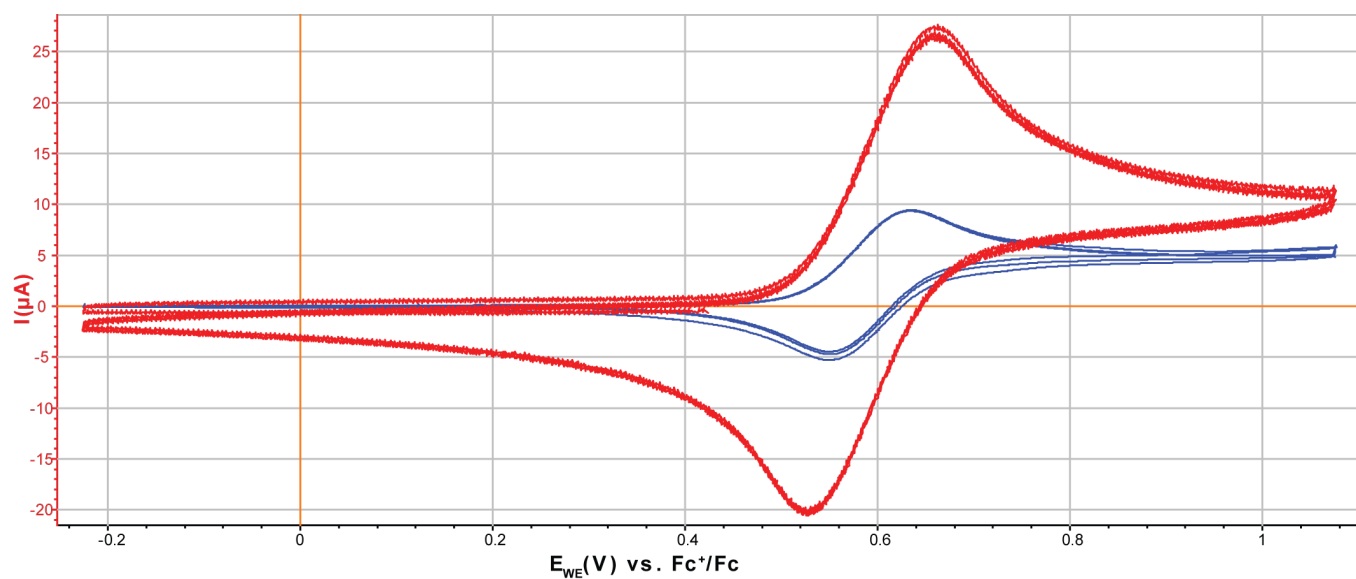

**Figure S8:** Cyclic voltammograms of Pd(dppf)Cl<sub>2</sub> (1.00 mM). Fc-centered oxidation event at scan rates of 100 mV s<sup>-1</sup> (red) and 10 mV s<sup>-1</sup> (blue). Shown are 3 cycles starting from  $E_{oc}$  in DCM (100 mM TBAPF<sub>6</sub>).

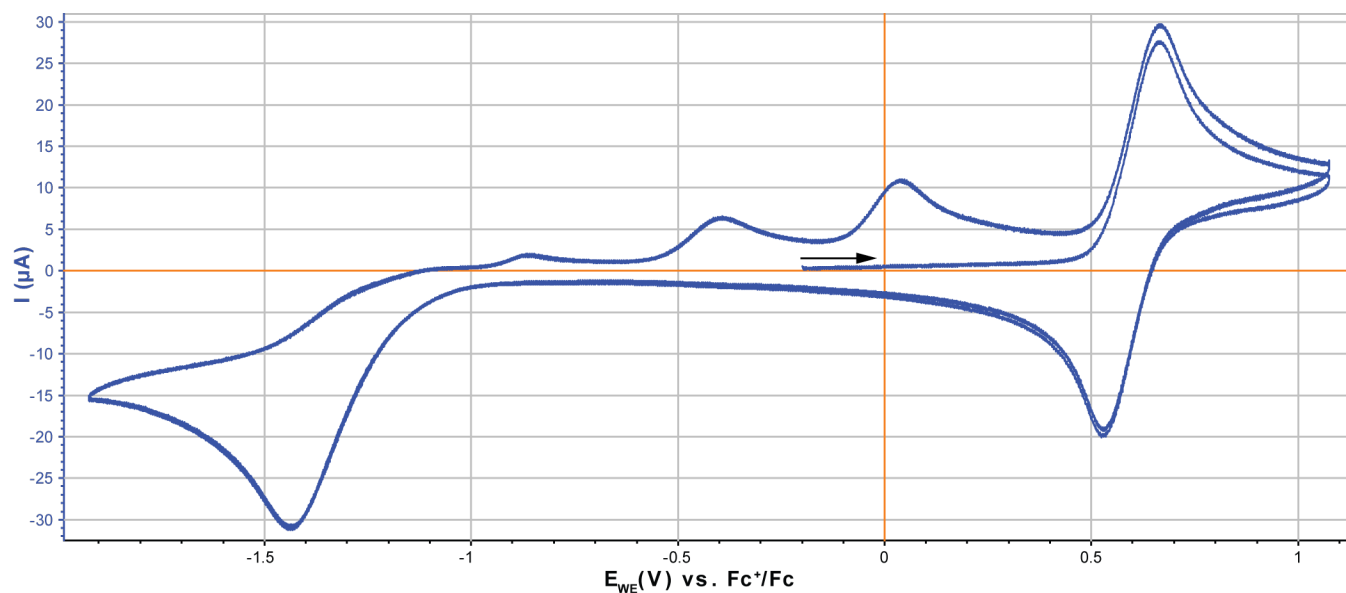

**Figure S9:** Cyclic voltammograms of Pd(dppf)Cl<sub>2</sub> (1.00 mM). Shown are 3 cycles starting from  $E_{oc}$  at 100 mV/s in DCM (100 mM TBAPF<sub>6</sub>).



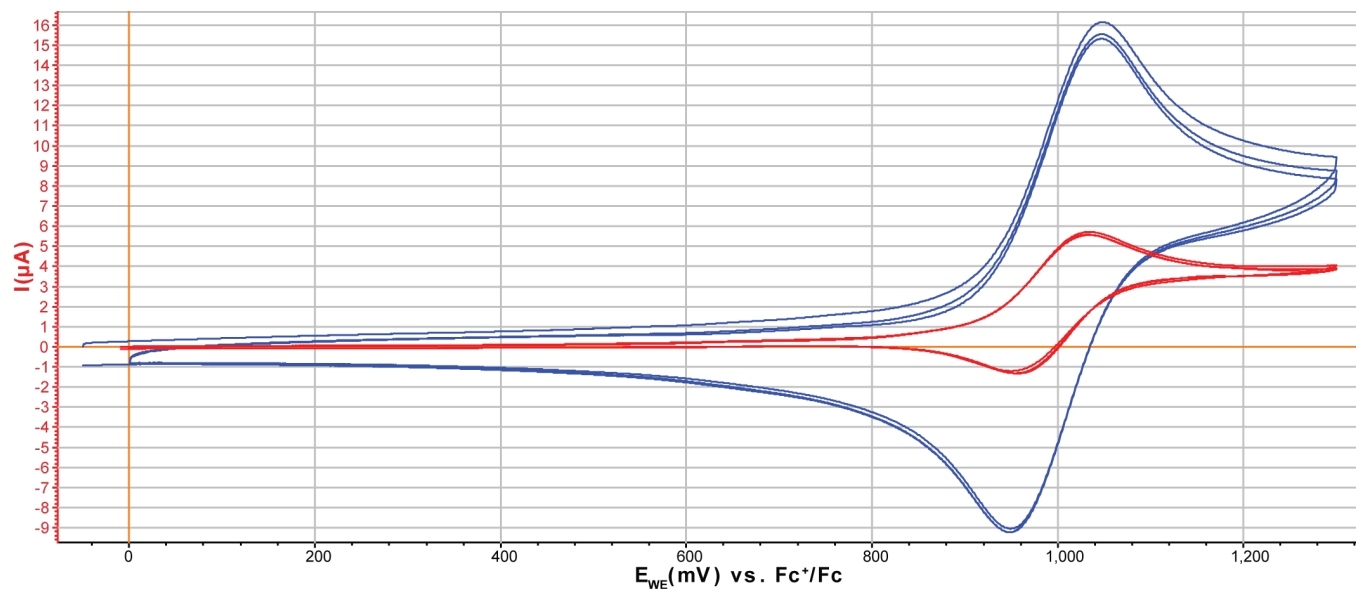

**Figure S10:** Cyclic voltammograms of  $\text{Pd(dppf)bpy}$  (1.80 mM) Fc-centered oxidation event at scan rates of 100  $\text{mV s}^{-1}$  (blue) and 10  $\text{mV s}^{-1}$  (red). Shown are 3 cycles starting from  $E_{\text{oc}}$  in DCM (100 mM  $\text{TBAPF}_6$ ).

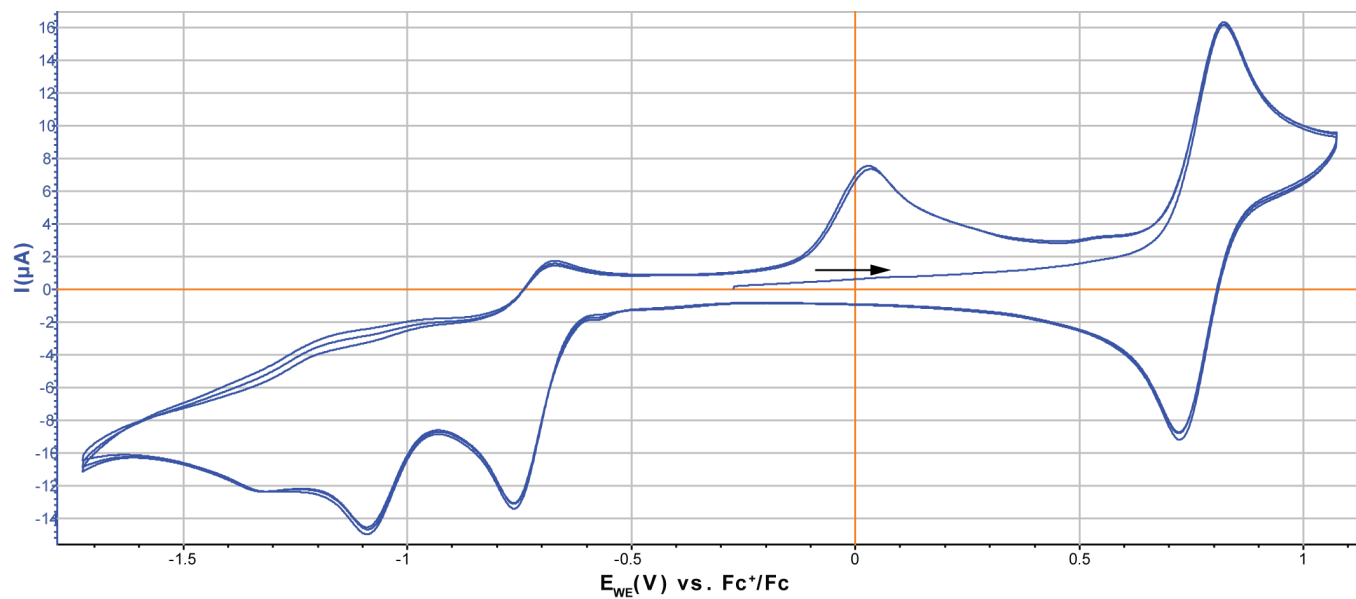

**Figure S11:** Cyclic voltammograms of  $\text{Pd(dppf)bpy}$  (1.80 mM). Shown are 3 cycles starting from  $E_{\text{oc}}$  at 100  $\text{mV/s}$  in DCM (100 mM  $\text{TBAPF}_6$ ).

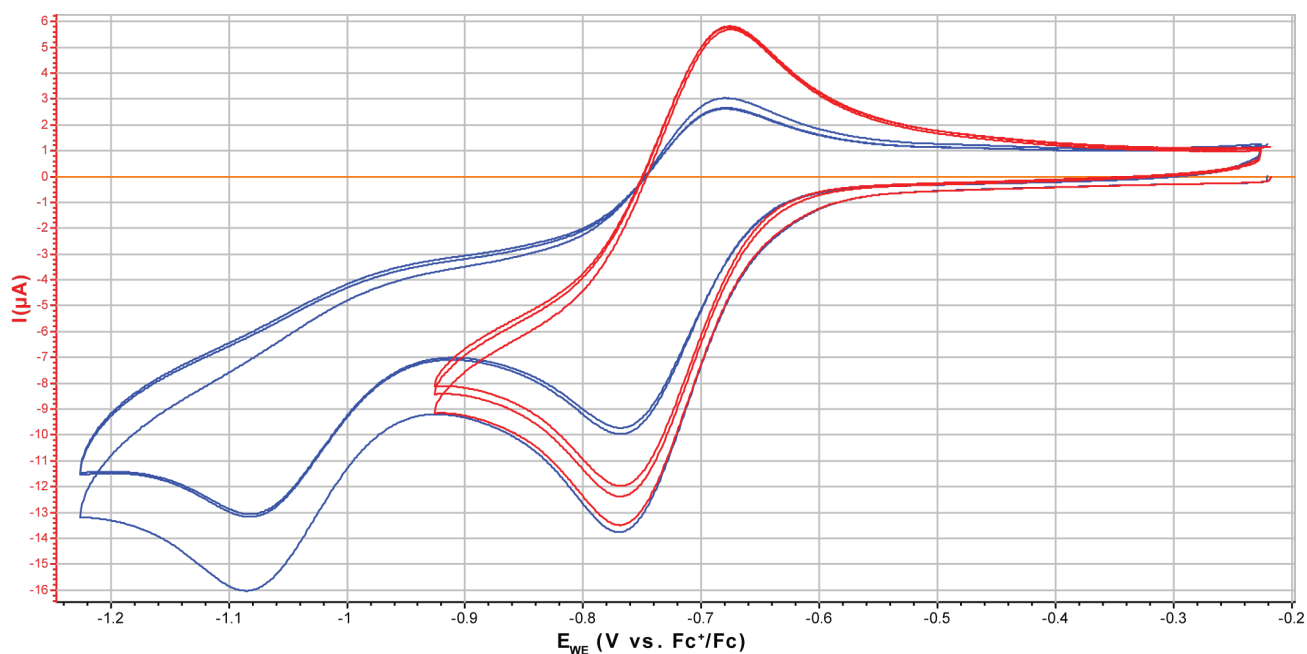

**Figure S12:** Cyclic voltammograms of Pd(dppf)bpy reduction events with varying potential windows. Shown are 3 cycles starting from  $E_{oc}$  at 100 mV/s in DCM (100 mM TBAPF<sub>6</sub>).

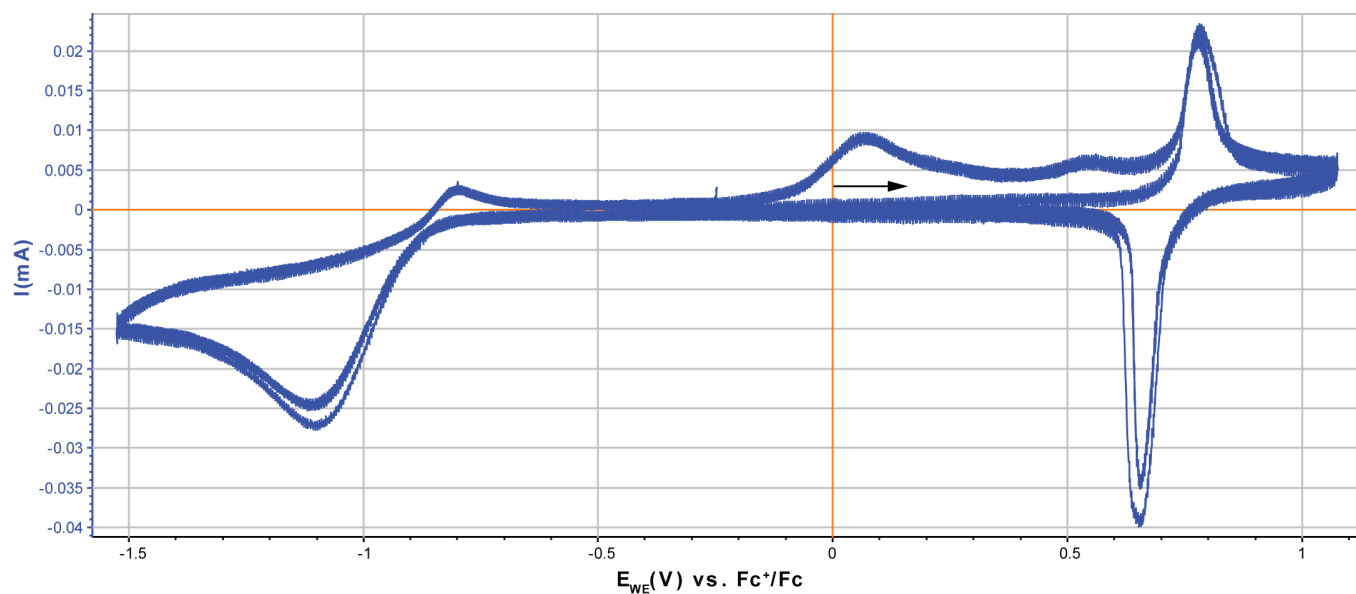

**Figure S13:** Cyclic voltammograms of Pd(dppf)TPT (0.30 mM). Shown are 3 cycles starting from  $E_{oc}$  at 100 mV/s in DCM (100 mM TBAPF<sub>6</sub>).

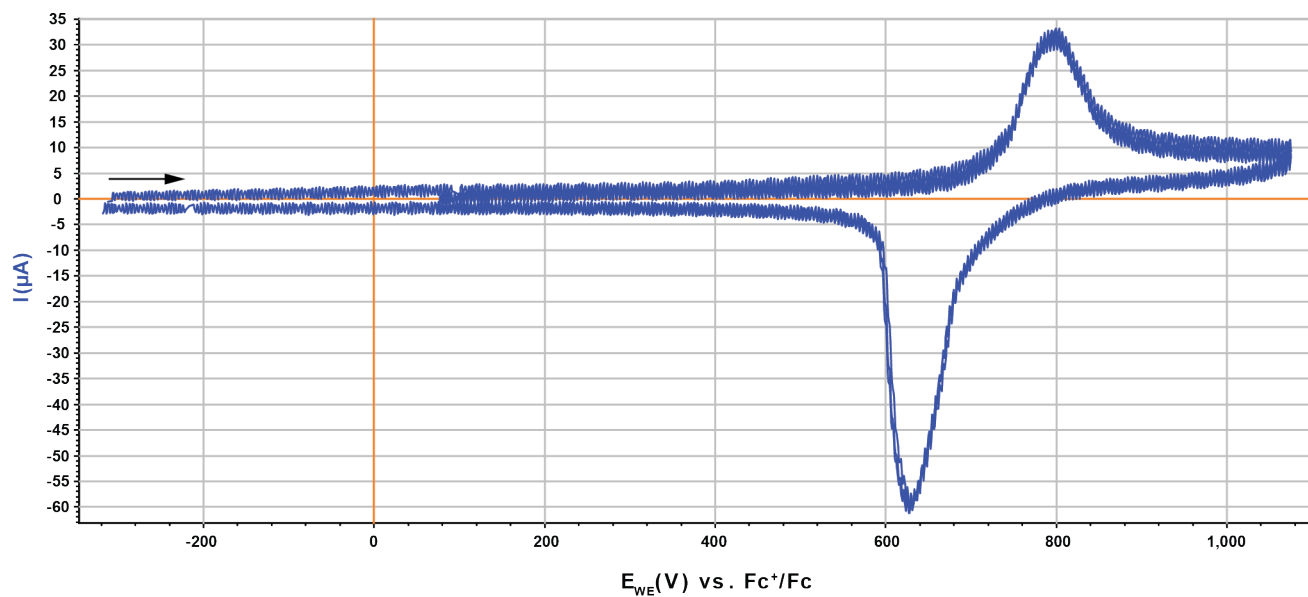

**Figure S14:** Cyclic voltammograms of **Pd(dppf)TPT** (0.30 mM). Shown are 3 cycles starting from  $E_{oc}$  at 250 mV/s in DCM (100 mM TBAPF<sub>6</sub>).

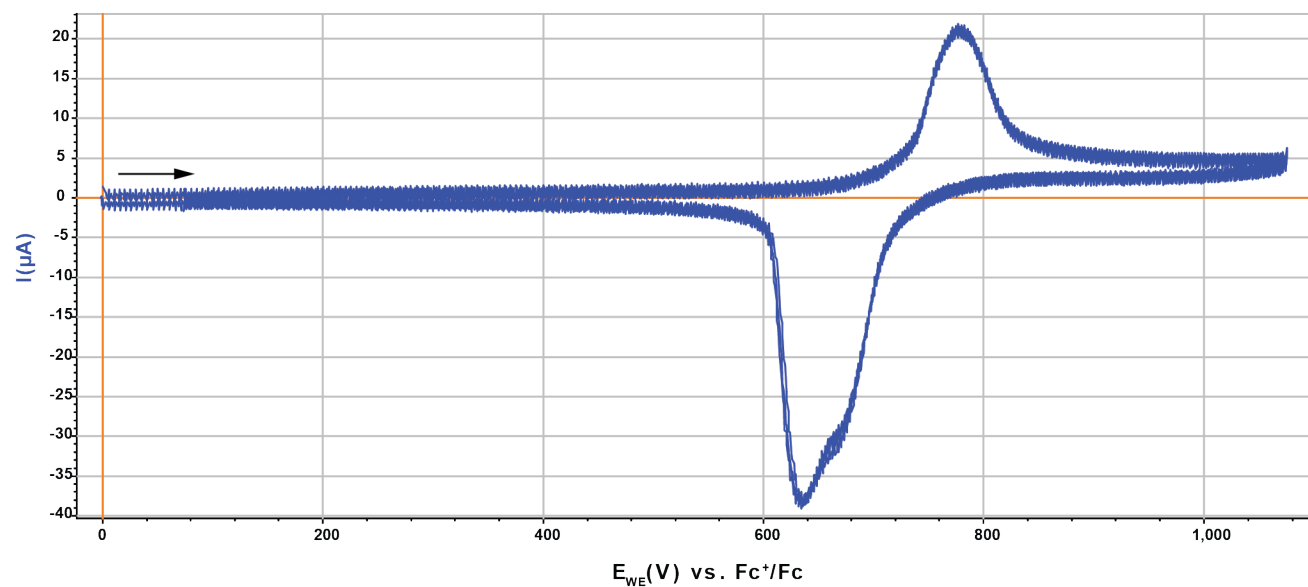

**Figure S15:** Cyclic voltammograms of **Pd(dppf)TPT** (0.30 mM). Shown are 3 cycles starting from  $E_{oc}$  at 100 mV/s in DCM (100 mM TBAPF<sub>6</sub>).

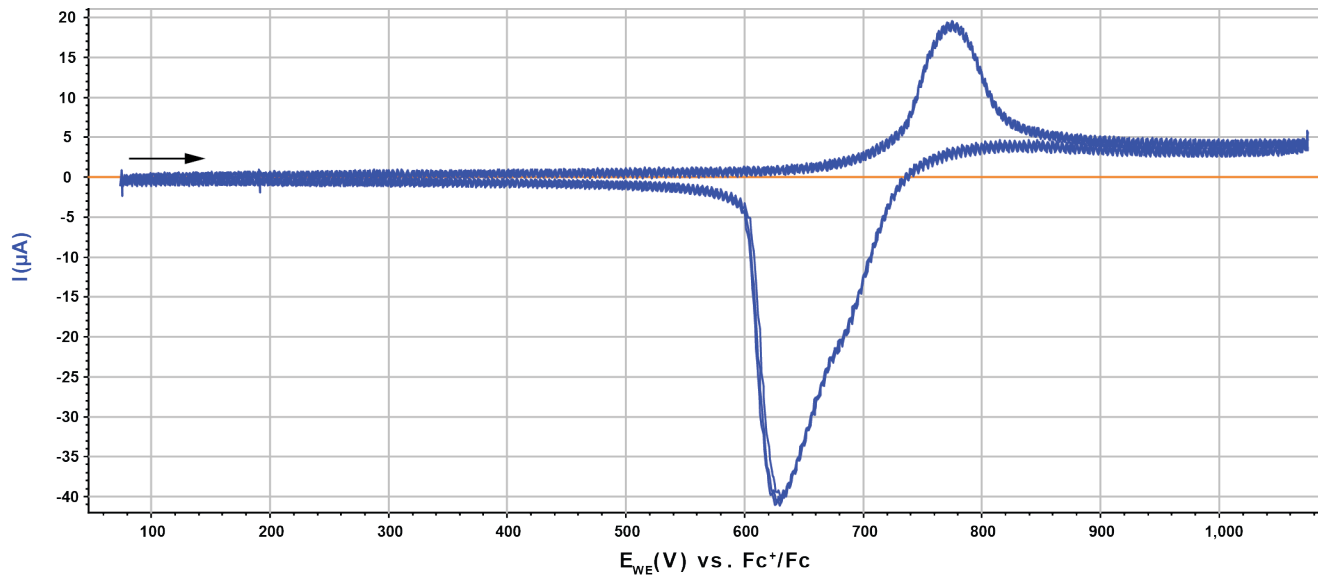

**Figure S16:** Cyclic voltammograms of **Pd(dppf)TPT** (0.30 mM). Shown are 3 cycles starting from  $E_{oc}$  at 80 mV/s in DCM (100 mM TBAPF<sub>6</sub>).

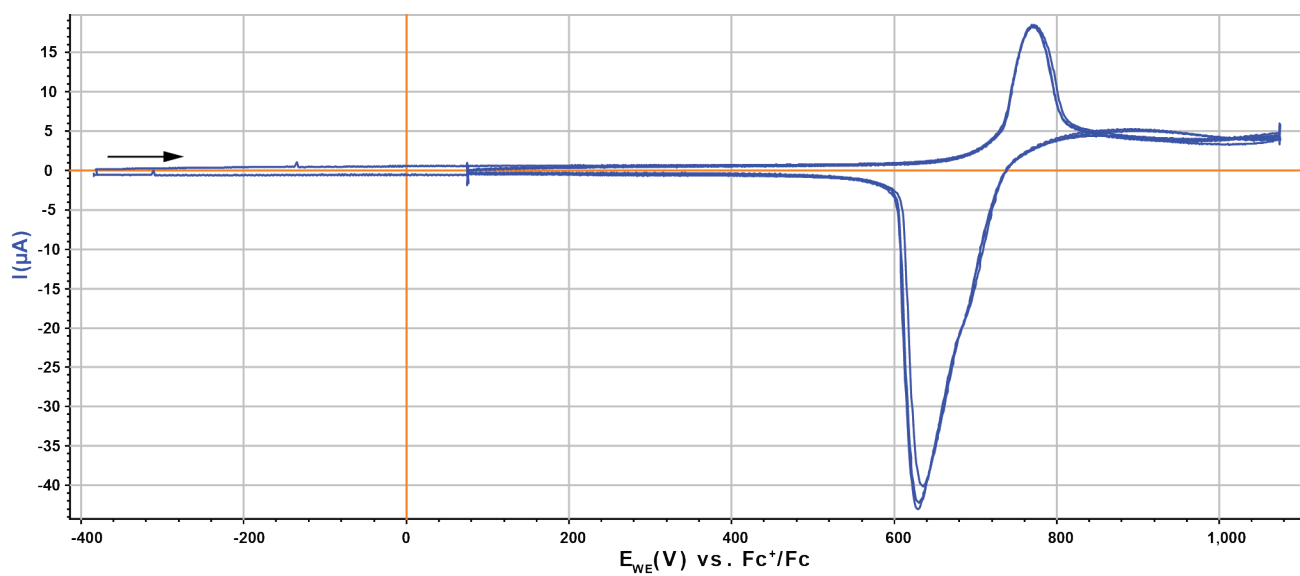

**Figure S17:** Cyclic voltammograms of **Pd(dppf)TPT** (0.30 mM). Shown are 3 cycles starting from  $E_{oc}$  at 60 mV/s in DCM (100 mM TBAPF<sub>6</sub>).

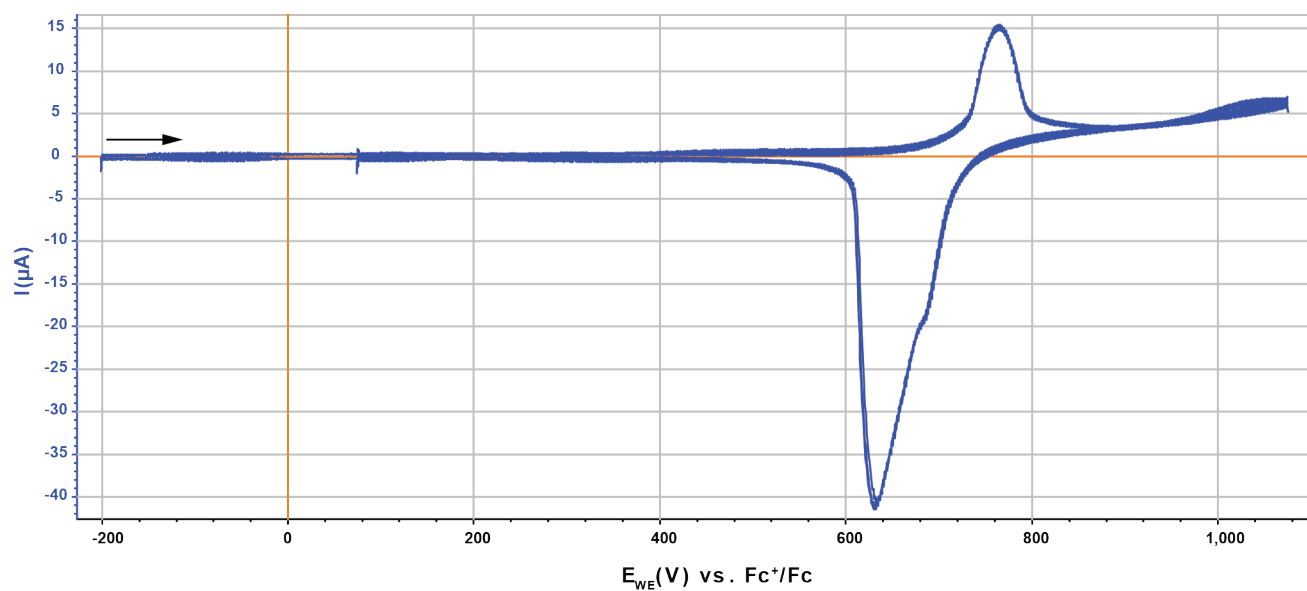

**Figure S18:** Cyclic voltammograms of **Pd(dppf)TPT** (0.30 mM). Shown are 3 cycles starting from  $E_{oc}$  at 40 mV/s in DCM (100 mM TBAPF<sub>6</sub>).

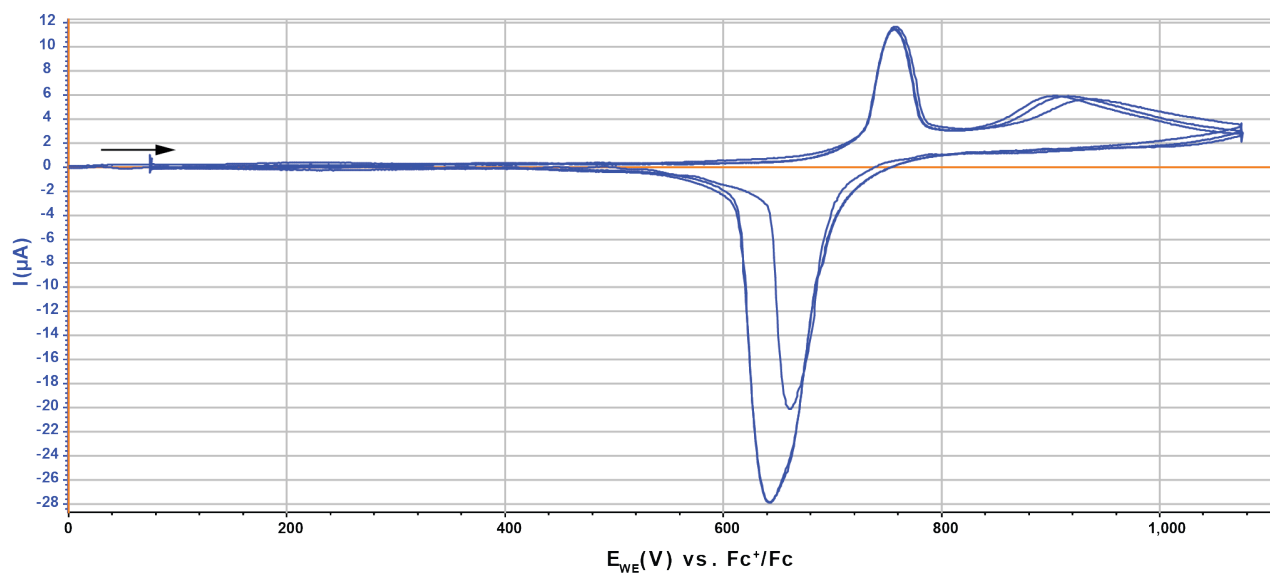

**Figure S19:** Cyclic voltammograms of **Pd(dppf)TPT** (0.30 mM). Shown are 3 cycles starting from  $E_{oc}$  at 20 mV/s in DCM (100 mM TBAPF<sub>6</sub>).

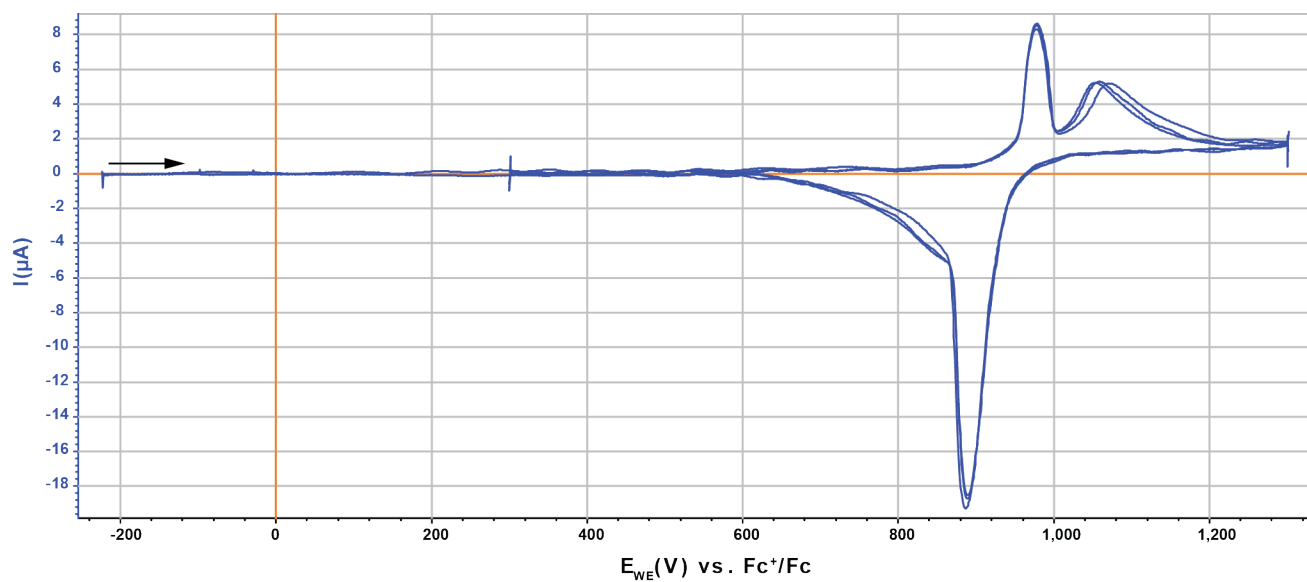

**Figure S20:** Cyclic voltammograms of **Pd(dppf)TPT** (0.30 mM). Shown are 3 cycles starting from  $E_{oc}$  at 10 mV/s in DCM (100 mM TBAPF<sub>6</sub>).

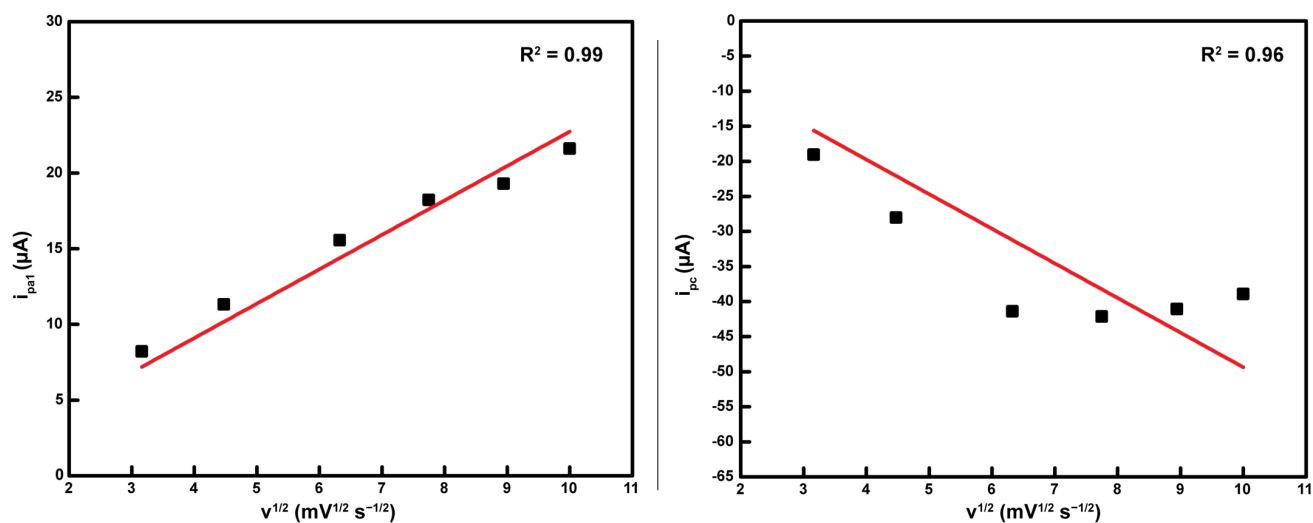

**Figure S21:** Relationship between peak current ( $i$ ) and the square root of scan rate ( $v^{1/2}$ ) from cyclic voltammograms of 0.30 mM **Pd(dppf)TPT** in DCM (100 mM TBAPF<sub>6</sub>) for the first anodic peak (left) and the cathodic peak (right). Linear fits are shown in red.

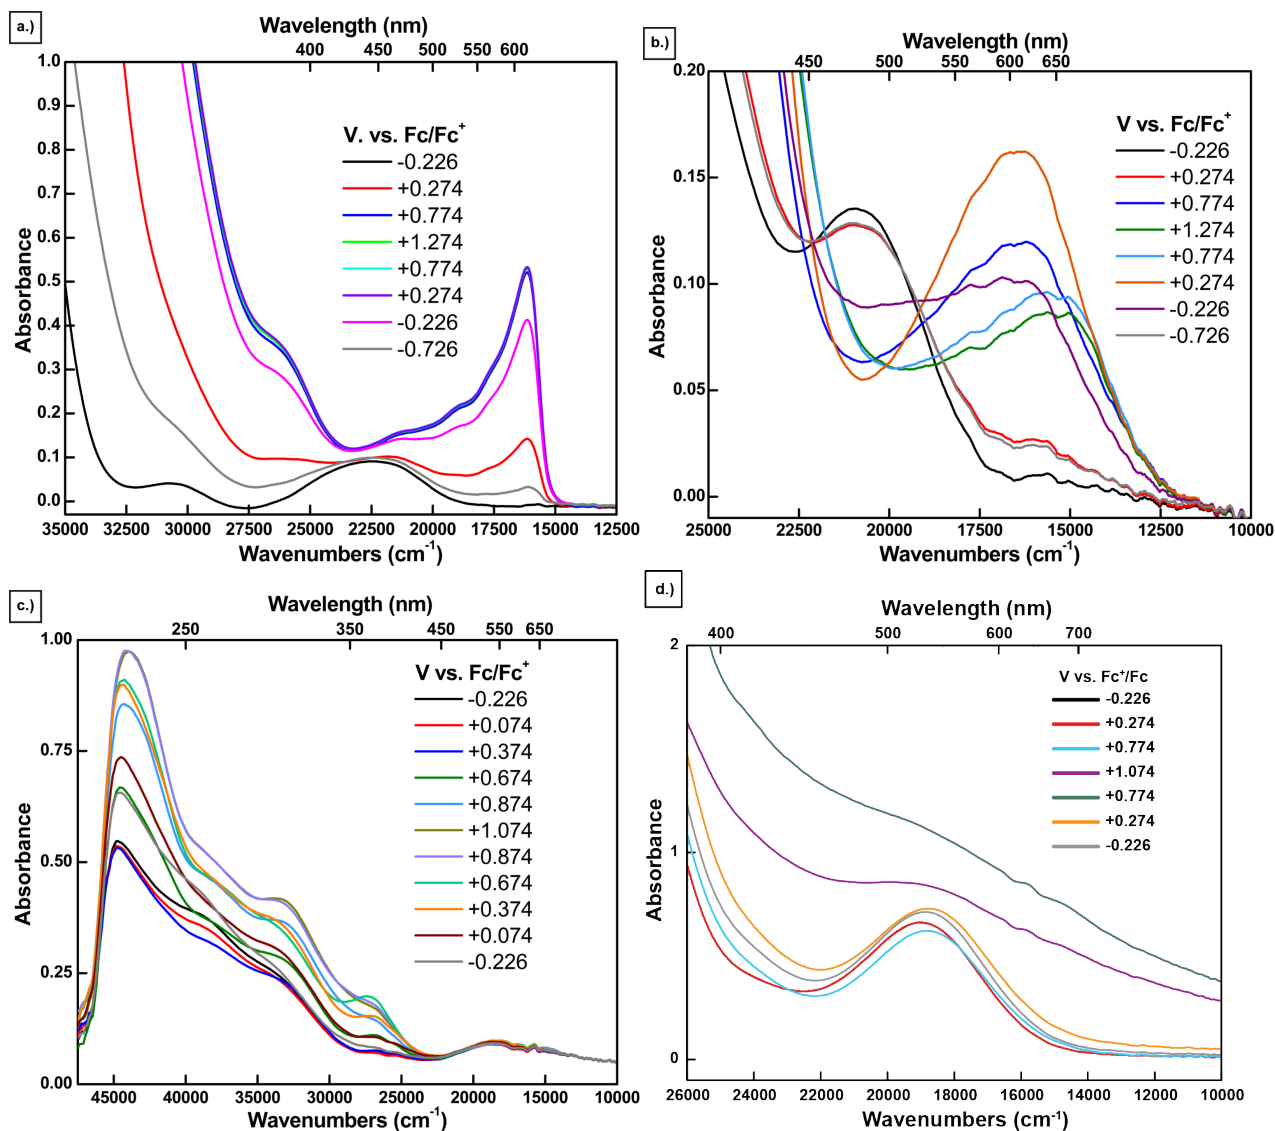

**Figure S22:** UV-Vis absorbance spectra acquired from spectroelectrochemical experiments probing the Fc-centered oxidation events of a.) **Fc** (1.8 mM), b.) **Pd(dppf)Cl<sub>2</sub>** (1.8 mM), c.) **Pd(dppf)TPT** (0.04 mM), and d.) **Pd(dppf)TPT** (0.30 mM). All solutions were prepared in dry DCM (100 mM TBAPF<sub>6</sub>).

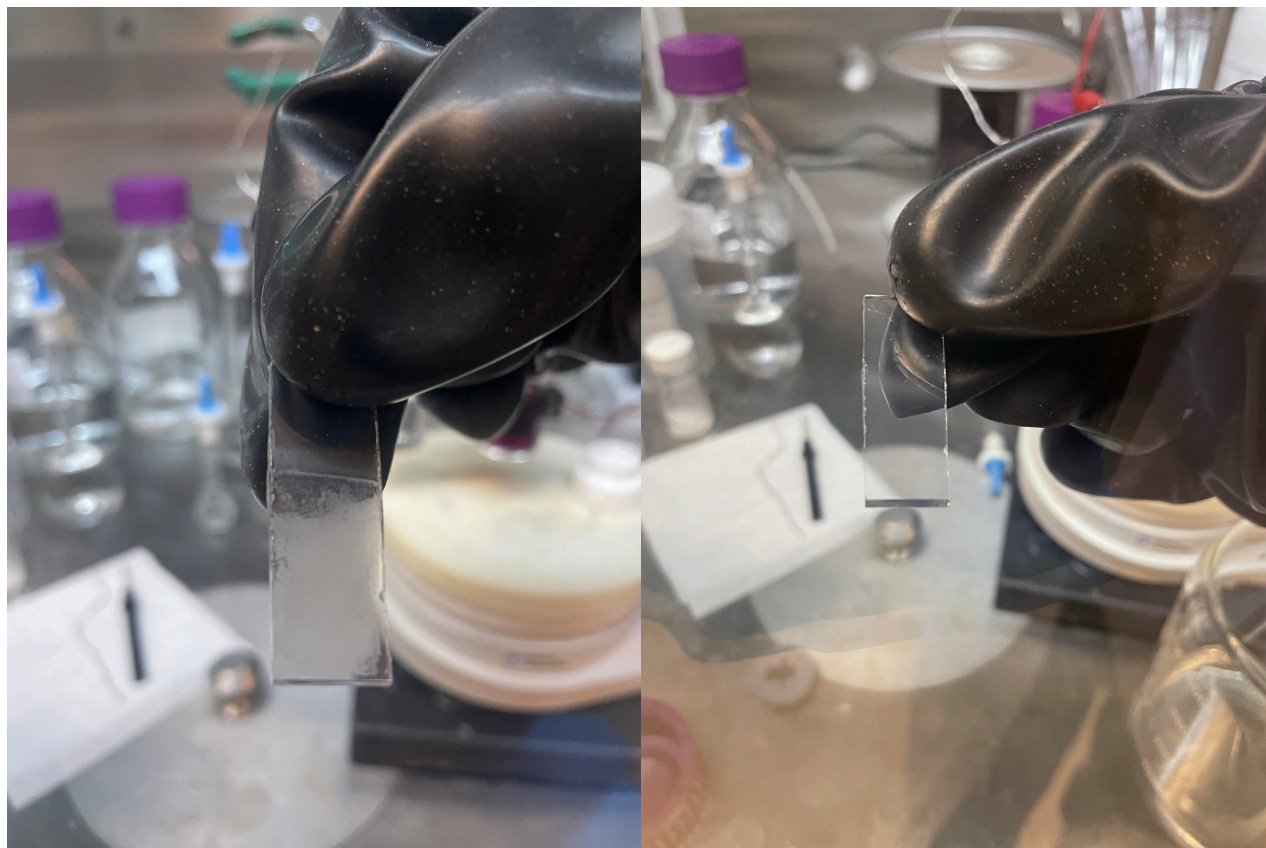

**Figure S23:** Photographs of FTO working electrode used in diffuse reflectance spectroelectrochemical experiments. The FTO films shown are following: (1) the bulk oxidation and deposition of **Pd(dppf)TPT** (left), and (2) the subsequent bulk rereduction of the **Pd(dppf)TPT**-modified film (right).
